# Supplementary material for: A close view of the organic linker in a MOF: structural insights from a combined 1H NMR relaxometry and computational investigation
Source: Royal Society of Chemistry journal article supplement (doi:10.1039/d0cp01863e), 2020-01-01
Supplement: d0cp01863e1.pdf [file d0cp01863e1.pdf]

# A close view to the organic linker in a MOF: structural insights from a combined $^1\text{H}$ NMR relaxometry and computational investigation

Silvia Pizzanelli,<sup>†,\*</sup> Susanna Monti,<sup>†</sup> Larisa Gordeeva,<sup>‡,×</sup> Marina V. Solovyeva,<sup>‡,×</sup>  
Angelo Freni,<sup>†</sup> Claudia Forte<sup>†</sup>

<sup>†</sup> *CNR-ICCOM, Institute of Chemistry of Organometallic Compounds, via G. Moruzzi 1,  
56124 Pisa, Italy*

<sup>‡</sup> *Boreskov Institute of Catalysis, Ac. Lavrentiev av. 5, Novosibirsk 630090, Russia*

<sup>×</sup> *Novosibirsk State University, Pirogova str. 1, Novosibirsk 630090, Russia*

Corresponding author: [silvia.pizzanelli@cnr.it](mailto:silvia.pizzanelli@cnr.it)

## Table of Content

**Fig. S1.** Distributions of H-N-H angles and N distances to the plane of the its ligands obtained from sampled configurations extracted from the molecular dynamics simulations at 25 and 100 °C.

**Fig. S2.** Representative configuration of *NH<sub>2</sub>-MIL-125* extracted from the molecular dynamics simulations at the 25 °C used to predict the EFG PAS orientation (yellow lines) on the different nitrogen sites. In this structure, the -CNH<sub>2</sub> moieties are planar. The tensor is perpendicular to the CHH plane and the N lone pair in the planar moiety is essentially a slightly polarized p<sub>z</sub> atomic orbital. Thus, it should have a contribution to V<sub>zz</sub> larger than the lone pair in a pyramidal nitrogen. The periodic replicas are represented with grey lines.

**Fig. S3.** <sup>13</sup>C-<sup>1</sup>H LG-CP spectrum of *NH<sub>2</sub>-MIL-125*. The <sup>1</sup>H-<sup>13</sup>C dipolar splitting of carbon atoms 3, 5, 6, which are bound to a hydrogen, is about 10 kHz, which compares with 13 kHz, the value expected on the basis of the formula  $-\frac{\mu_0}{4\pi} \frac{\gamma_{1H}\gamma_{13C}\hbar^2}{r_{HC}^3} \cos\theta_m$ ,<sup>3</sup> where  $\gamma_{1H}$  and  $\gamma_{13C}$  represent the gyromagnetic ratios of <sup>1</sup>H and <sup>13</sup>C nuclei, respectively,  $\mu_0$  is the vacuum permeability,  $\hbar$  is the Planck constant,  $r_{HC}$  is the distance C-H, with  $r_{HC}=1.1 \text{ \AA}$  and  $\theta_m=54.7^\circ$ . On the contrary, the <sup>1</sup>H-<sup>13</sup>C dipolar splitting of carbon atoms 1, 2, 4, 7, 8, which are not bound to a hydrogen, is much smaller.

**Fig. S4.** Evolution of the hydrogen bond distance during the first 300 ps of the dynamics at T=110 °C.

**Fig. S5.** Principal components of the <sup>14</sup>N EFG tensor (blue lines) in two different local structures of the BDC-NH<sub>2</sub> unit of *NH<sub>2</sub>-MIL-125*. **a)** sp<sup>2</sup> nitrogen hybridization, NH<sub>2</sub> on the molecular plane; **b)** sp<sup>3</sup> nitrogen hybridization, NH<sub>2</sub> perpendicular to the molecular plane (extracted from the MD trajectory at 110 °C). In both cases the V<sub>zz</sub> component of the EFG tensor is along the lone pair direction.

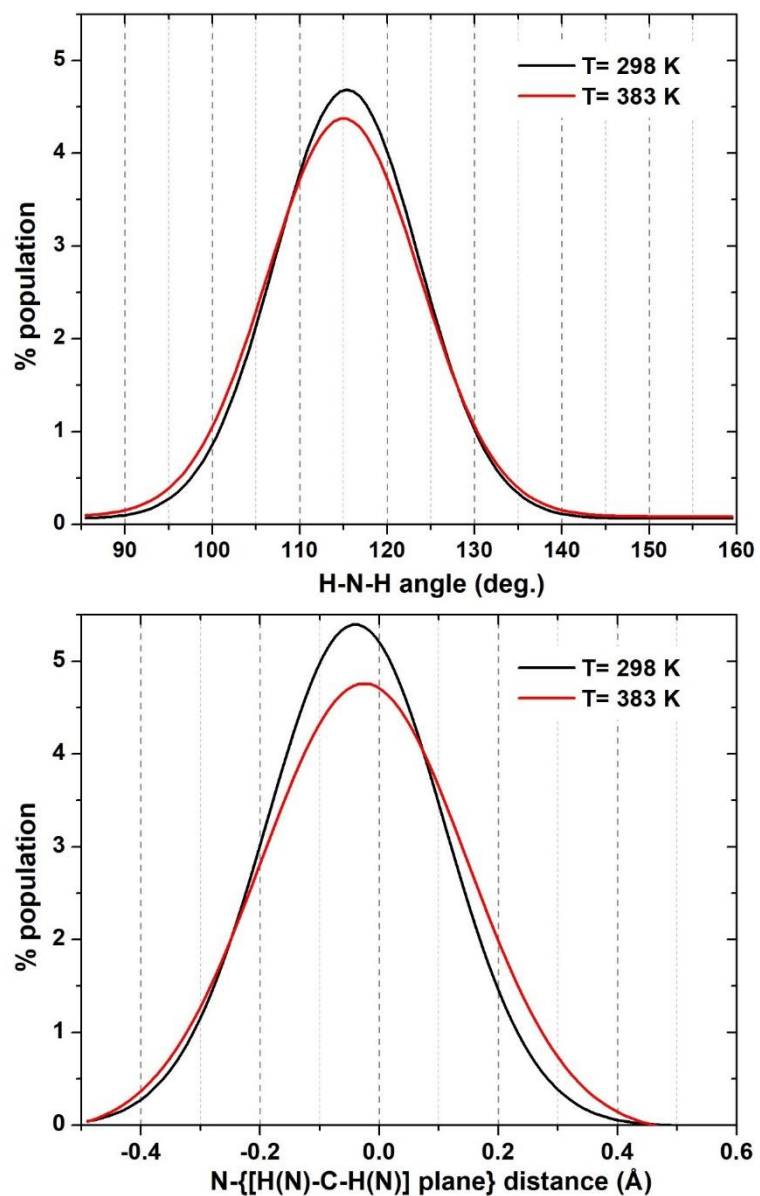

**Fig. S1.** Distributions of H-N-H angle (**top**) and N distance to the plane of the its ligands (**bottom**) obtained from sampled configurations extracted from the molecular dynamics simulations at the indicated temperatures.

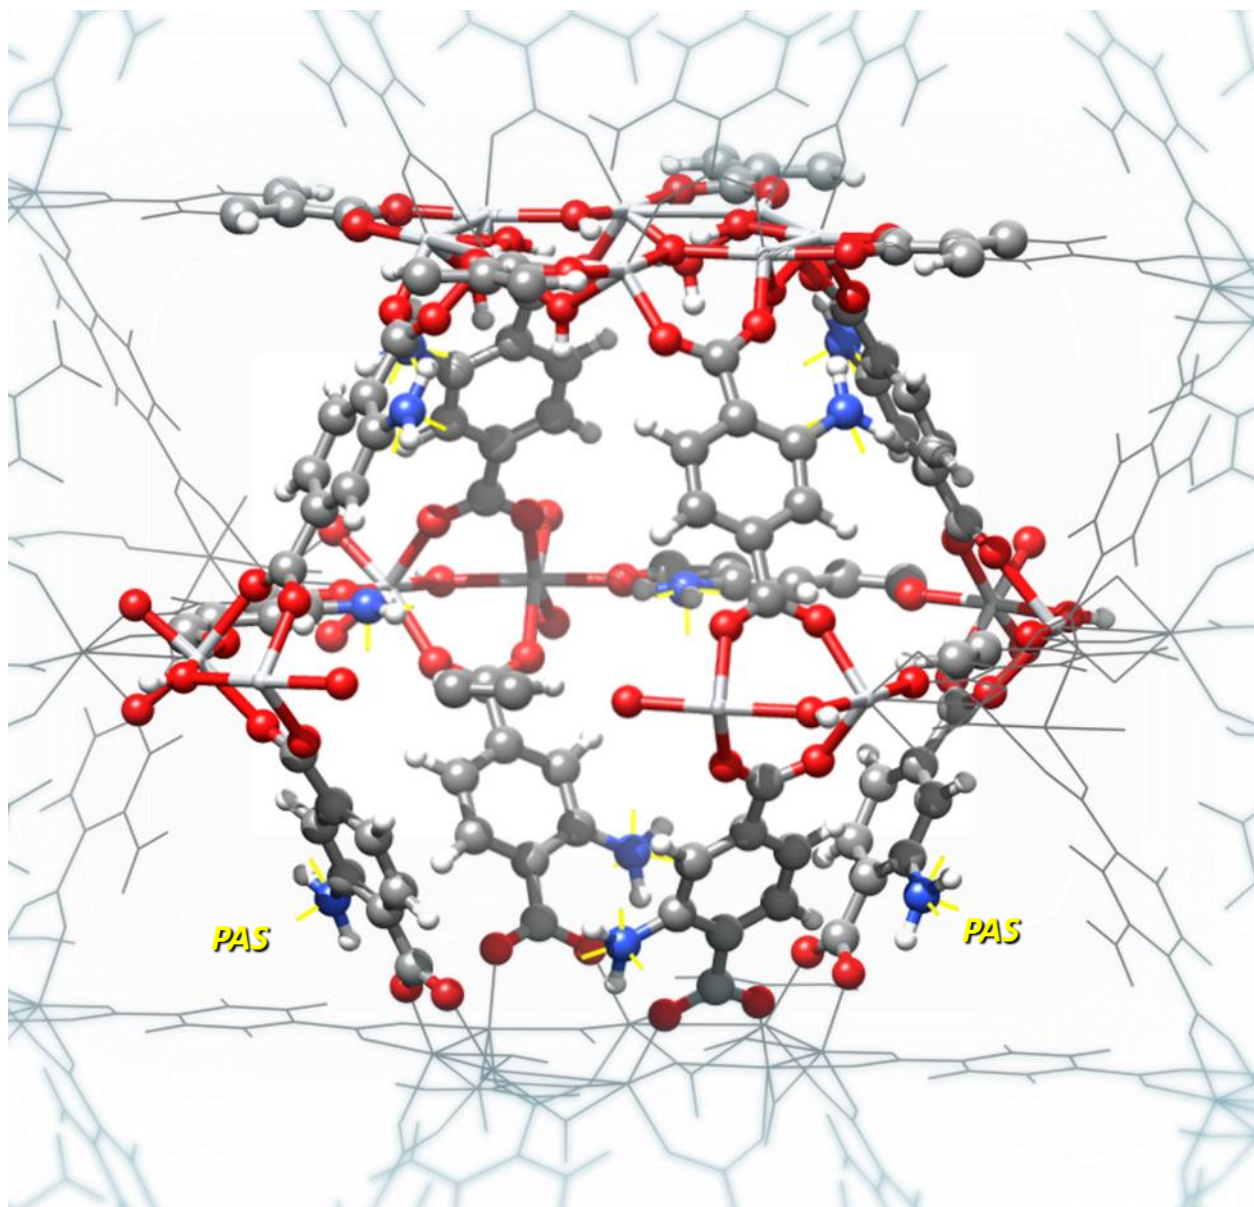

**Fig. S2.** Representative configuration of  $NH_2$ -MIL-125 extracted from the molecular dynamics simulations at the 25 °C used to predict the EFG PAS orientation (yellow lines) on the different nitrogen sites. In this structure, the  $-CNH_2$  moieties are planar. The tensor is perpendicular to the CHH plane and the N lone pair in the planar moiety is essentially a slightly polarized  $p_z$  atomic orbital. Thus, it should have a contribution to  $V_{zz}$  larger than the lone pair in a pyramidal nitrogen. The periodic replicas are represented with grey lines.

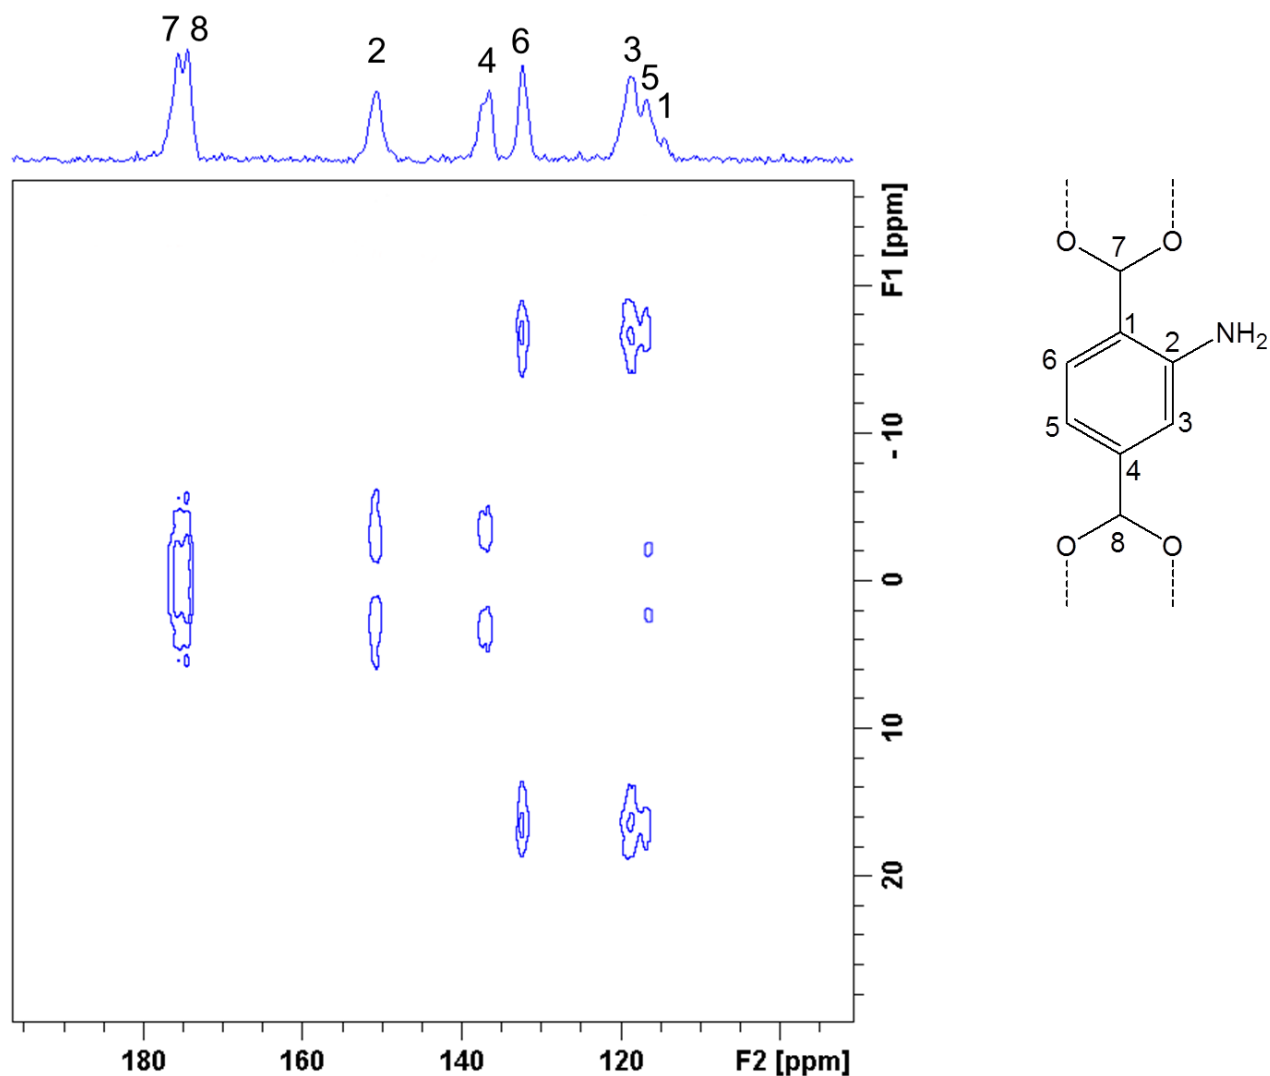

**Fig. S3.**  $^{13}\text{C}$ - $^1\text{H}$  LG-CP spectrum of  $\text{NH}_2\text{-MIL-125}$ . The  $^1\text{H}$ - $^{13}\text{C}$  dipolar splitting and the isotropic  $^{13}\text{C}$  chemical shift appear on F1 and F2 dimensions, respectively. The assignment of the  $^{13}\text{C}$  signals is based on that reported for IRMOF-3 in ref. 1.

The  $^1\text{H}$ - $^{13}\text{C}$  dipolar splitting of carbon atoms 3, 5, 6, which are bound to a hydrogen, is about 10 kHz, which compares with 13 kHz, the value expected on the basis of the formula

$$-\frac{\mu_0}{4\pi} \frac{\gamma_{^1\text{H}} \gamma_{^{13}\text{C}} \hbar^2}{r_{\text{HC}}^3} \cos\theta_m,$$

where  $\gamma_{^1\text{H}}$  and  $\gamma_{^{13}\text{C}}$  represent the gyromagnetic ratios of  $^1\text{H}$  and  $^{13}\text{C}$  nuclei, respectively,  $\mu_0$  is the vacuum permeability,  $\hbar$  is the Planck constant,  $r_{\text{HC}}$  is the distance C-H, with  $r_{\text{HC}} = 1.1 \text{ \AA}$  and  $\theta_m = 54.7^\circ$ .

On the contrary, the  $^1\text{H}$ - $^{13}\text{C}$  dipolar splitting of carbon atoms 1, 2, 4, 7, 8, which are not bound to a hydrogen, is much smaller.

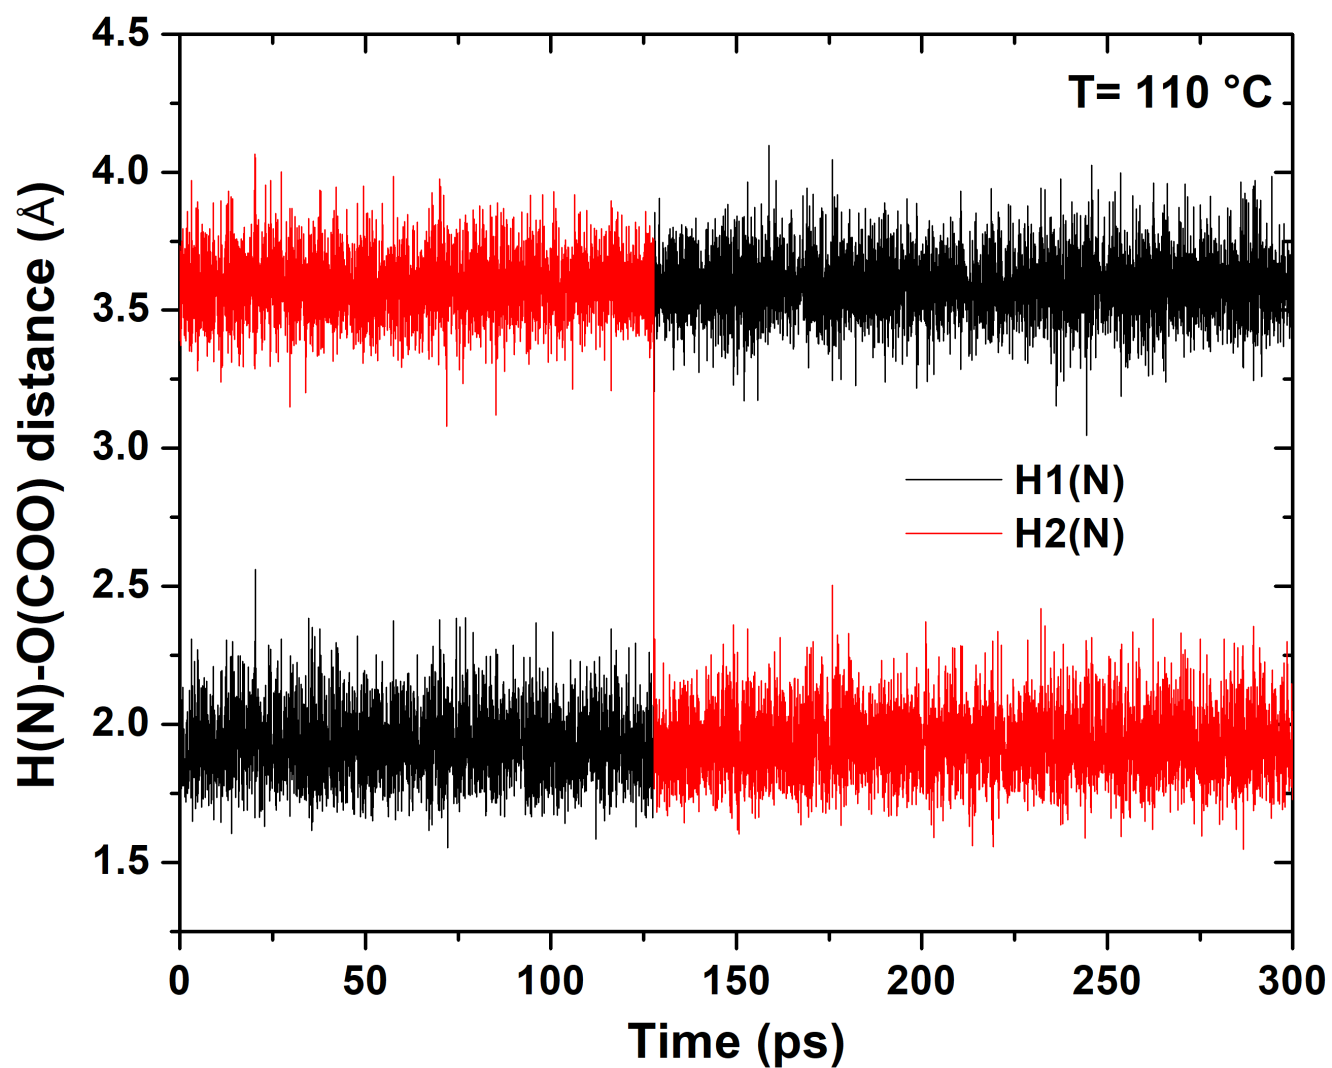

Fig. S4. Evolution of the hydrogen bond distance during the first 300 ps of the dynamics at T=110 °C.

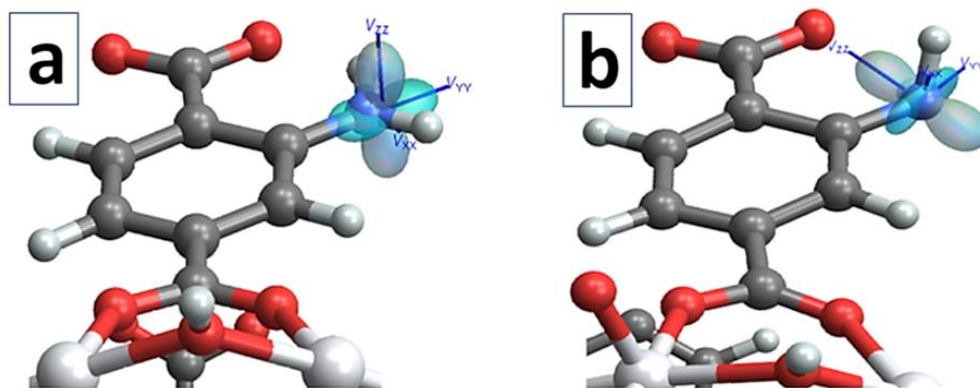

**Fig. S5.** Principal components of the  $^{14}\text{N}$  EFG tensor (blue lines) in two different local structures of the BDC- $\text{NH}_2$  unit of  $\text{NH}_2\text{-MIL-125}$ . **a)**  $\text{sp}^2$  nitrogen hybridization,  $\text{NH}_2$  on the molecular plane; **b)**  $\text{sp}^3$  nitrogen hybridization,  $\text{NH}_2$  perpendicular to the molecular plane (extracted from the MD trajectory at  $110\text{ }^\circ\text{C}$ ). In both cases the  $V_{zz}$  component of the EFG tensor is along the lone pair direction. The representation of EFG tensors as surfaces obtained by means of TensorView is shown.<sup>3</sup>

---

<sup>1</sup> Morris, W.; Taylor, R. E.; Dybowski, C.; Yaghi, O. M.; Garcia-Garibay, M. A. Framework mobility in the metal–organic framework crystal IRMOF-3: Evidence for aromatic ring and amine rotation. *J. Mol. Struct.* **2011**, *1004*, 94-101.

<sup>2</sup> van Rossum, B.-J.; de Groot, C. P.; Ladizhansky, V.; Vega, S.; de Groot, H. J. M. A Method for Measuring Heteronuclear (<sup>1</sup>H-<sup>13</sup>C) Distances in High Speed MAS NMR *J. Am. Chem. Soc.* **2000**, *122*, 3465-3472.

<sup>3</sup> R. P. Young, C. R. Lewis, C. Yang, L. Wang, J. K. Harper, L. J. Mueller “TensorView: A software tool for displaying NMR tensors” *Magn. Reson. Chem.* **2019**, *57*, 211–223.
